# Supplementary material
Source: PubMed Central journal article supplement (PMC4002954)
Supplement: cmi201034x1.pdf [file cmi201034x1.pdf]

# Study population

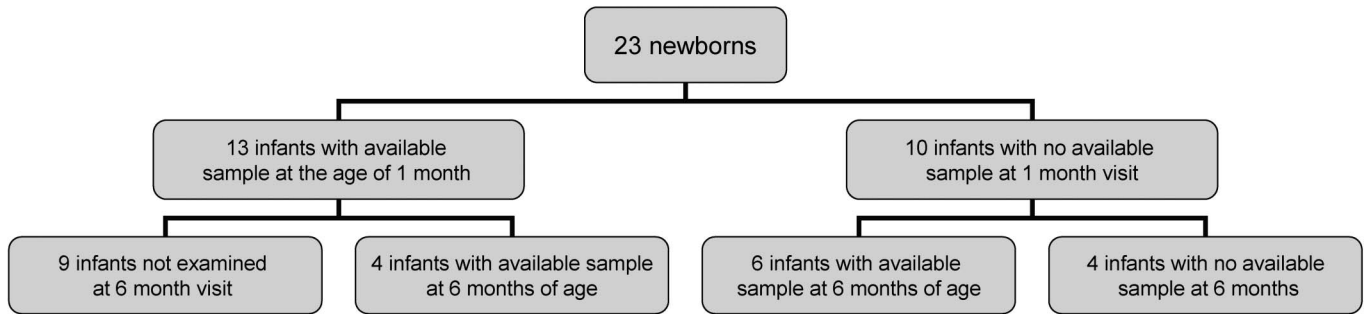

**Supplemental Figure 1** Representation of the visits of the subject group infants included in the study. Of the 10 children examined at the age of 6 months, only four infants were seen at all three time points, while the remaining six infants were seen at birth and at 6 months of age.
